# Reference Bioluminescence to assess the phenotypic trait diversity of bryophytes within the family Scapaniaceae

## Authors

Kristian Peters<sup>1,2,3</sup>, Birgitta König-Ries<sup>1,4,5</sup>

## Affiliations

1 – German Centre for Integrative Biodiversity Research (iDiv) Halle-Jena-Leipzig, Puschstraße 4, 04103 Leipzig, Germany

2 – Institute of Biology/Geobotany and Botanical Garden, Martin Luther University Halle-Wittenberg, Am Kirchtor 1, 06108 Halle (Saale), Germany

3 – Bioinformatics and Scientific Data, Leibniz Institute of Plant Biochemistry, Weinberg 3, 06120 Halle (Saale), Germany

4 – Heinz-Nixdorf Chair for Distributed Information Systems, Friedrich Schiller University, Jena, Germany

5 – Michael Stifel Center Jena, Jena, Germany

corresponding author(s): Kristian Peters ([kpeters@ipb-halle.de](mailto:kpeters@ipb-halle.de))

## Abstract

Macro- and microscopic images of organisms are pivotal in biodiversity research. Despite that bioimages have manifold applications such as for assessing the diversity of form and function, FAIR bioimaging data in the context of biodiversity are still very scarce, especially for difficult taxonomic groups such as bryophytes. Here, we present a high-quality reference dataset containing macroscopic and bright-field microscopic images documenting various phenotypic attributes of the species belonging to the family of Scapaniaceae occurring in Europe. To encourage data reuse in biodiversity and adjacent research areas, we annotated the imaging data with machine-actionable meta-data using community-accepted semantics. Furthermore, raw imaging data are retained and any contextual image processing like multi-focus image fusion and stitching were documented to foster good scientific practices through source tracking and provenance. The information contained in the raw images are also of particular interest for machine learning and image segmentation used in bioinformatics and computational ecology. We expect that this richly annotated reference dataset will encourage future studies to follow our principles.

## Background & Summary

In biodiversity, organisms are studied with the aim to record their diversity at the genetic, metabolic, physiological, morphological, or the ecosystem level. Despite the fact that bioimaging techniques such as macro- and microscopy are prominently used, FAIR bioimaging data in the context of biodiversity are still very scarce<sup>1-3</sup>. This is especially the case for taxonomically difficult and underrepresented groups such as bryophytes. Currently, there are approx. 24'000 species of bryophytes known to science<sup>4</sup>. Unlike vascular plants, bryophytes lack well-differentiated organs that protect them from environmental exposures and pathogens. As a result, phenotypes are often cryptic and difficult to identify visually as they have developed unique specialised metabolisms and cell structures such as oil bodies<sup>5,6</sup>.

The highly diverse family of Scapaniaceae contains 48 taxa in Europe<sup>7</sup> and is an ecologically important group regarding environmental adaptations<sup>8</sup>, the biochemistry of terpenoid natural products and other chemical structures<sup>9-12</sup>, the metabolism of pollutants and heavy metals<sup>13,14</sup>, and phylogenetics<sup>15-18</sup>. Generally, there is a considerable lack of described traits

52 in bryophytes<sup>19</sup> and especially in liverworts such as Scapaniaceae, phenotypic traits to assess  
53 the diversity of form and function are understudied<sup>20</sup>.

54

55 Bioimaging data in the field of biodiversity is of high relevance as they allow to assess the  
56 phenotypic diversity through an analysis and assessment of images<sup>2,21,22</sup>. In the form of  
57 measurable phenotypic traits, biological images are the groundwork of many ecological  
58 studies<sup>3,20,21,23,24</sup>. Phenotypisation through recording images of anatomical and morphological  
59 attributes allows qualitative and quantitative measurements of molecular structures relating  
60 to genetics, molecular pathways and biotechnology<sup>25-27</sup>. Bioimages have also gained a lot of  
61 interest in citizen sciences and in the digitization of natural history collections and digital  
62 herbaria<sup>28,29</sup>. Furthermore, meta-synthesis methods, which synthesise disparate data sources  
63 spanning published case studies, have great potential to reveal context-dependencies within  
64 bioimaging research data<sup>30</sup>.

65

66 Macroscopy and microscopy are characterized by physical constrains resulting in diffraction  
67 and shallow depth of field<sup>22,31,32</sup>. From a technical perspective, our data employs two major  
68 methods to significantly extend the depth of field and increase the resolution of the  
69 composite images: image stitching (combining several images relative to the x- and y-axes of  
70 the visible accommodation to form an image with a larger frame)<sup>33,34</sup> and multi-focus image  
71 fusion (merging multiple images at different focal planes of the z-axis in such a way that only  
72 regions in focus will contribute to the resulting image)<sup>35,36</sup>. In this regard, the raw data also  
73 allows to be reused for combining image fusion with computational super-resolution<sup>22,37-40</sup>.

74

75 Cloud infrastructural resources are able to execute computational workflows that combine  
76 data with computational analysis tools at a large scale<sup>41,42</sup>. However, there is still a  
77 considerable lack of data containing machine-actionable meta-data<sup>1,3,43-46</sup>. To foster  
78 provenance, any raw and segmented image in this data set has been associated with a rich  
79 set of contextual and expressive meta-data<sup>47</sup>, documenting the phenotypic attributes, and  
80 recording any digital image processing (i.e., increasing contrast, brightness, image fusion).  
81 The meta-data has been formatted with community-accepted semantics that allow for  
82 machine-actionable data-mining and to create scientific workflow modules that produce  
83 segmented composite images automatically by reusing the instructions contained in our  
84 meta-data<sup>20,42,45,46,48</sup>.

85

86 In this Data Descriptor, we present the principles to generate reference images from raw  
87 microscopic bioimaging data and show how individual images are associated with technical  
88 and expressive meta-data. Despite that we were able to associate our images with a rich set  
89 of meta-data, we ascertain that there is still a lack of usable ontological terms and schemas  
90 in bioimaging with regard to documenting image processing and associating individual  
91 images with phenotypic attributes<sup>3,45</sup>. Our high-resolution images allow for large prints and  
92 zooming into images to obtain critical details, which is particularly important for species  
93 identification and for computational image analyses, computer-assisted species recognition  
94 and identification<sup>49,50</sup>. Despite that we have deposited the data in the two specialised  
95 imaging repositories BioStudies (containing raw and pre-processed images which enable  
96 rapid use in, i.e., machine learning approaches in computational ecology) and Imaging Data  
97 Resource (containing pre-processed and fully segmented images to be rapidly reused by  
98 ecologists), we ascertain that there is still the need for connecting macro- and microscopic  
99 bioimaging data to biodiversity platforms<sup>3,51</sup> such as iDigBio<sup>52</sup> and GBIF<sup>53</sup>, or even the citizen  
100 scientists community-effort iNaturalist<sup>54</sup>. Our reference data framework facilitates the  
101 further integration of bioimaging data into other research disciplines<sup>55</sup> and, thus, we want to  
102 inspire future data reuse and meta-synthesis in the fields of biodiversity and computational  
103 ecology.

104  
105  
106  
107  
108  
109  
110  
111  
112  
113  
114

## Methods

Representative voucher specimens were received from different herbaria. Table 1 lists all used voucher specimen and freshly collected samples. Fresh samples of *Diplophyllum taxifolium*, *Scapania cuspiduligera*, *Scapania gymnostomophila* and *Scapania subalpina* were additionally collected at various sites, put into envelopes on-site, identified and photographed afterwards. Information regarding the date, site (including geographical coordinates), habitat, substrate and other further information were collected.

| Species names                                                         | Taxonomy IDs                                | Reference of voucher specimens                                                                                                                                                                                                                                                                                                                                            | Voucher identifiers         |
|-----------------------------------------------------------------------|---------------------------------------------|---------------------------------------------------------------------------------------------------------------------------------------------------------------------------------------------------------------------------------------------------------------------------------------------------------------------------------------------------------------------------|-----------------------------|
| <i>Diplophyllum albicans</i> (L.) Dumort.                             | NCBI:264775<br>GBIF:5286350<br>OTT:1055640  | Urmi, E. (1999): Schweiz, Kt. Ticino, Caviono: Valle Di S. Abbondio, 704.40/106.98, ca. 850 müM                                                                                                                                                                                                                                                                           | Urmi-8371                   |
| <i>Diplophyllum obtusatum</i> (R.M.Schust.) R.M.Schust.               | NCBI:2212631<br>GBIF:5710146<br>OTT:3855725 | Urmi, E. (2017): Schweiz, Kt. Ticino, Chiasso: im Bosca Penz oberhalb Bresciano, 721.27/76.88, ca. 300 müM                                                                                                                                                                                                                                                                | Urmi-10695                  |
| <i>Diplophyllum obtusifolium</i> (Hook.) Dumort.                      | NCBI:248354<br>GBIF:5710147<br>OTT:831945   | Urmi, E. (1988): Schweiz, Kt. Ticino, Cugnasco: Alpe di Ruscada oberhalb Corte di mezzo, 715.00/119.00, ca. 1550 müM                                                                                                                                                                                                                                                      | Urmi-4501                   |
| <i>Diplophyllum taxifolium</i> (Wahlenb.) Dumort.                     | NCBI:248355<br>GBIF:5710140<br>OTT:831946   | Urmi, E. (1975): Italien, Ot. Crigiono Mesocco, oberhalb San Bernardina, am linken Seitenback der Moesa nordwestlich von Careida Sot, Landeskarte 734.34/147.91, Felsnische an der Seitenwand der kleinen Schlucht, ca. 1680 müM.<br>Peters, K. (2020): Schweiz, in Erdloch unter Felsspalte, 46.083813428, 7.923810274, 2614m +- 5m                                      | Urmi-1060<br>Peters-2020-21 |
| <i>Douinia ovata</i> (Dicks.) H.Buch                                  | NCBI:248357<br>GBIF:2689235<br>OTT:831948   | Urmi, E. (1980): Spanien, Prov. Oviedo (Asturias), Cangas de Narcea: Monte de Muniellos bei Tablizas oberhalb Venta Nueva, v. Madrid: 3°0'20"W / 43°2'10"N, ca. 820 müM, an trockenen Felsen                                                                                                                                                                              | Urmi-2056                   |
| <i>Scapania aequiloba</i> (Schwägr.) Dumort.                          | NCBI:464313<br>GBIF:7696978<br>OTT:382426   | Urmi, E. (1976): Schweiz, Kt. Zürich: Hütten, Chrüzbrunnen am Höhronen-Nordhang, auf anstehendem Molasse-Sandstein im Schluchtwald, ca. 910 müM, Ost-Exposition<br>Urmi, E. (2018): Schweiz, Kt. Uri, Spiringen (Enklave Urnerboden): unterhalb Waldrüti, 712.09/194.26, ca. 1340 müM, Straßenböschung, Kalkfelsen                                                        | Urmi-1111<br>Urmi-10772     |
| <i>Scapania apiculata</i> Spruce                                      | NCBI:537844<br>GBIF:4277163<br>OTT:655684   | Hürlimann, H. (1983): Japan, an morschom, trockenem Stamm in Birkenwald beim 5-gome am Mt. Fuji, Japan, ca. 2200 müM                                                                                                                                                                                                                                                      | Z-000130732                 |
| <i>Scapania aspera</i> M.Bernet & Bernet                              | NCBI:399155<br>GBIF:7435100<br>OTT:683885   | Bertram, J. (2007): Schweiz, SO, Seewen, SW Fulnau, E Risenberg, 613.845/253.87 680 müM, Eingang zu einer Gasse zwischen steilen Felswänden im Fagetum, Felsabsatz, auf kantig-rauhem Kalkgestein                                                                                                                                                                         | Bertram-3283a               |
| <i>Scapania brevicaulis</i> Taylor                                    | GBIF:4277188<br>OTT:3855710                 | Macurian, S.M. (1900)                                                                                                                                                                                                                                                                                                                                                     | Zürich-00000                |
| <i>Scapania calcicola</i> (Arnell & J.Perss.) Ingham                  | NCBI:537846<br>GBIF:4277184<br>OTT:655680   | Hürlimann, H. (1968): Schweiz, Schattiger Kalkfelsen im obersten Teil des Berghügels Ramstein bei Bretzol BL                                                                                                                                                                                                                                                              | Z-000129406                 |
| <i>Scapania carinthiaca</i> var. <i>massalongi</i> J.B.Jack ex Lindb. | GBIF:8320028                                | Meier, M. (2019): Schweiz, Kt. SZ, Gemeinde Sattel, Bärenfang, Zufluss zum Lautobelbach, Koord: 692.912/213.421+-6m, Höhe: 1300 müM, Waldbach, vermodernder, ins Bachbett ragender Stamm einer Fichte oder Tanne<br>Høitomt, T. (2018): Norway: Oppland: Vestre Slidre, Mosåni, På dødved av gran langs elva, Host: Picea abies, UTM: 499542,6769666, Alt: 400m, 3.7.2018 | ZT-337051<br>TRH-B108431    |
| <i>Scapania compacta</i> (Roth) Dumort.                               | NCBI:402640<br>GBIF:9148635<br>OTT:168110   | Urmi, E. (1980): Italien, Sardegna, Prov. di Nuoro, Airtzo oberhalb des Dorfes am Weg nach Badu Arala, Ret. ital.: 1517.8 E / 4423.4 N, ca. 1020 müM, bei einem Brunnen an Felsen (kalkarm)                                                                                                                                                                               | Urmi-1951                   |

|                                                                      |                                            |                                                                                                                                                                                                                                                                                                                                           |                                              |
|----------------------------------------------------------------------|--------------------------------------------|-------------------------------------------------------------------------------------------------------------------------------------------------------------------------------------------------------------------------------------------------------------------------------------------------------------------------------------------|----------------------------------------------|
| <i>Scapania crassiretis</i> Bryhn                                    | NCBI:248358<br>GBIF:4277199<br>OTT:831941  | Hürlimann, H. (1947): Italien, auf der Nordseite der Talsperre von Caraglia GR                                                                                                                                                                                                                                                            | Hürlimann-H252                               |
| <i>Scapania curta</i> (Mart.) Dumort.                                | NCBI:537847<br>GBIF:2689216<br>OTT:655678  | Culmann, P. (1998)                                                                                                                                                                                                                                                                                                                        | ZT-7/93-5                                    |
| <i>Scapania cuspiduligera</i> (Nees) Müll.Frib.                      | NCBI:537848<br>GBIF:8306353<br>OTT:655688  | Urmi, E. (1990): Schweiz, Kt. Wallis, Evolene: Comba Louva am linken Talhang, CH1903/LV03: 601.00 / 109.00, ca. 1860 müM, Nadelwald offene Stelle auf stellenweise kalkreichem Stein<br>Peters, K. (2020): Schweiz, auf Erde, Hang, 46.037564627, 7.954650076, 2240m, +-5m                                                                | Urmi-5345<br>Peters-2020-09                  |
| <i>Scapania degenii</i> Schiffn. ex Müll.Frib.                       | NCBI:537848<br>GBIF:8306353<br>OTT:655688  | Gustafsson, L. (1989): Jämtland, Undersåker par., Ristafällen, S-side inbetween rocks near the stream, below the fall                                                                                                                                                                                                                     | CP-CM30374                                   |
| <i>Scapania glaucocephala</i> (Taylor) Austin                        | NCBI:537849<br>GBIF:4277200<br>OTT:655686  | Schuster, R.M. (1956): USA, Decaying logs, shaded swamp along small stream, Sturgeon Bay in Wildwood State Park, Emmet Co., Michigan<br>Høitomt, T. (2018): Norway: Oppland: Etnedal, Fjellselve, På låg av osp i elvekant, Host: Populus tremula, UTM-WGS84: 534192,6750148, Alt: 375                                                    | CP-CM30377<br>TRH-B108428                    |
| <i>Scapania gracilis</i> Lindb.                                      | NCBI:264776<br>GBIF:5837556<br>OTT:844266  | Urmi, E. (1982): Spanien, Prov. Oviedo (Asturias), Ponga ca 2.5km oberhalb Sellaño, am Rio Ponga (rechte Seite) v. Madrid: 1°31'10"W, 43°13'55"N, ca 280 müM, sehr steiler felsiger Hang, Felsstufe, kalkarm                                                                                                                              | Urmi-2211                                    |
| <i>Scapania gymnostomophila</i> Kaal.                                | NCBI:537850<br>GBIF:4277196<br>OTT:133595  | Urmi, E. (2016): Schweiz, Kt. Grischun, Valsot am Strässchen nördl. v. Dorf Tschlin, 827.66/195.71, ca. 1550 müM, Wandrand an der Strasse, schieferige Kalkfelsen<br>Peters, K. (2020): Schweiz, auf Erde, west-exponierter Hang, 46.039167304, 7.954680641, 2237m, +-10m                                                                 | Urmi-10478<br>Peters-2020-16                 |
| <i>Scapania helvetica</i> Gottsche                                   | NCBI:537851<br>GBIF:7787988<br>OTT:133598  | Urmi, E. (1998): Schweiz, Kt. Wallis, Zwischbergen: oberhalb Bidejmi im Laggintal, CH1903/LV03: 647.00/111.00, ca 2100 müM, felsiger Hang mit lockerem Grünerlen-Gebüsch, über Silikatfelsen auf Sand<br>Schnyder, N. (2012): Schweiz, UR, Realp, Furkapass, S Passhöhe, See bei Pt. 2650, 675.98/157.24, 2650m, Schneeboden feuchte Erde | Urmi-8131<br>ZT-210488                       |
| <i>Scapania hyperborea</i> Jørg.                                     | NCBI:402139<br>GBIF:8336103<br>OTT:247549  | Hallingbäck, T. (2019): Province: Jämtland. Parish: Åre, Locality: Staån, myrvegetationen, Long: 12.27523, Lat: 63.59544                                                                                                                                                                                                                  | Hallingbäck-50160                            |
| <i>Scapania irrigua</i> (Nees) Nees                                  | NCBI:537852<br>GBIF:2689217<br>OTT:133601  | Urmi, E. (1992): Schweiz, Kt. Uri, Wassen: oberhalb Kartigel im Meiental, 684/174, ca 1950 müM, grasiger Hang mit felsiger Rinne, feuchtes kalkarmes Gestein<br>Urmi, E. (2016): Schweiz, Kt. Graubünden, Val Müstair Buffalora, westlich vom Ofenpass 816.79/168.69, ca. 2110 müM, Flachmoor, Torfmoosbult                               | Urmi-6100<br>Urmi-10576                      |
| <i>Scapania irrigua</i> subsp. <i>irrigua</i> (Nees) Nees            | GBIF:7420792                               | Söderström, L. (1991): Sweden, Västerbotten, Sävar sn, Grisselögern, Bland stenar på stranden (Ruta i rikets nät: 20K67)                                                                                                                                                                                                                  | UME-78146                                    |
| <i>Scapania irrigua</i> subsp. <i>rufescens</i> (Loeske) R.M.Schust. | GBIF:8087753                               | Sørensen, T. (1933): Liverpool Land: Cape Hope, Lat 70.28, Long: 220.25 W                                                                                                                                                                                                                                                                 | CP-CM30429                                   |
| <i>Scapania kaurinii</i> Ryan                                        | NCBI:537853<br>GBIF:4277164<br>OTT:133603  | Laine, T. (1966): Enontekiö Lapland, Enontekiö, Porojärvat, Ridnitsohka mountain, In alpine top area, on soil, 1280m above sea level                                                                                                                                                                                                      | Z-026-1966                                   |
| <i>Scapania ligulifolia</i> R.M.Schust.                              | NCBI:1230444<br>GBIF:8288472<br>OTT:279012 | Frisvoll, A.A. (1973): Svalbard: Dickson Land, Nordfjorden NØ. Vestskråningen av Kongressfjellet litt S for toppen, 300-400 moh                                                                                                                                                                                                           | TRH-74054                                    |
| <i>Scapania lingulata</i> H.Buch                                     | NCBI:402641<br>GBIF:4277202<br>OTT:2063    | Buch, H. (1919): Finlandia Regio aboensis, Insula Hirvensalo, St. Marie, ad rupes                                                                                                                                                                                                                                                         | Zürich Buch-1919                             |
| <i>Scapania mucronata</i> H.Buch                                     | NCBI:537854<br>GBIF:4277191<br>OTT:133587  | Urmi, E. (1992): Schweiz, Kt. Uri, Realp: ob den Galenbödmern, 675.00 / 159.00; ca 2530 m ü. M.<br>Schnyder, N. (2003): Schweiz, NE Fleurier, Pouetta Raisse, 536.6 / 193.2, 1010 m<br>Buch, H. (1922): Finland, Regio aboensis, Angelniemi                                                                                               | Urmi-6291<br>Schnyder-47044<br>Zürich, Buch- |

|                                                          |                                             |                                                                                                                                                                                                                                                                                                                 |                                                |
|----------------------------------------------------------|---------------------------------------------|-----------------------------------------------------------------------------------------------------------------------------------------------------------------------------------------------------------------------------------------------------------------------------------------------------------------|------------------------------------------------|
| <i>Scapania nemorea</i> (L.) Grolle                      | NCBI:41848<br>GBIF:2689220<br>OTT:851174    | Urmi, E. (1981): Schweiz, Kt. Obwalden, Giswil: Altibach-Tobel beim Kleinteil, 654.36 / 186.25; ca. 650 m ü M.                                                                                                                                                                                                  | 1922<br>Urmi-2110                              |
| <i>Scapania nimbose</i> Taylor                           | NCBI:1133313<br>GBIF:8635654<br>OTT:1062948 | Wallace, E. (1955)                                                                                                                                                                                                                                                                                              | Zürich Wallace-1955                            |
| <i>Scapania obcordata</i> (Berggr.) S.W.Arnell           | NCBI:402140<br>GBIF:4277171<br>OTT:719916   | Zemp, F. (2019): Schweiz, Kanton: Be, Gemeinde: Innertkirchen, Sustenpass, Steinsee, Koord: 675.220/174.460, Höhe: 2050m, Standort: Bachalluvion                                                                                                                                                                | Zemp-337400                                    |
| <i>Scapania obscura</i> (Arnell & C.E.O.Jensen) Schiffn. | NCBI:1282292<br>GBIF:4277165<br>OTT:558046  | Urmi, E. (2019): Schweiz Kt. Wallis, Oberwald beim Totensee auf dem Grimselpass, CH1903/LV03: 669.03 / 156.76, ca. 2170 müM, kleines saures Flachmoor neben dem Bach, relativ grober Silikat-Sand                                                                                                               | Urmi-10928                                     |
| <i>Scapania ornithopodioides</i> (With.) Waddell         | NCBI:264777<br>GBIF:7512997<br>OTT:333110   | Culmann, P. (1908): Schweiz, Wallis, Grimsel, prope lac. d. Todtensee, in paludosis juxta rivulum, hygrophila, 2150m<br>Macricar, S.M. (1898):                                                                                                                                                                  | Zürich-0000<br>ZT-1898                         |
| <i>Scapania paludicola</i> Loeske & Müll.Frib.           | NCBI:209818<br>GBIF:4277131<br>OTT:245460   | Urmi, E. (1985): Schweiz, Kt. Obwalden, Engelberg Feldmoos auf Gerschni, 673.70/184.82, ca. 1230 müM, Moor, sehr nasser Torf                                                                                                                                                                                    | Urmi-3307                                      |
| <i>Scapania paludosa</i> (Müll.Frib.) Müll.Frib.         | NCBI:537855<br>GBIF:4277179<br>OTT:133589   | Urmi, E. (2019): Schweiz, Kt. Wallis, Oberwald beim Totensee auf dem Gimselpass, CG1903/LV03: 668.72/156.92, ca 2170 müM, moorige Stelle an einem Bach, teils im Wasser stehend, Silikat-Sand                                                                                                                   | Urmi-10924                                     |
| <i>Scapania parvifolia</i> Warnst.                       | GBIF:4277175<br>OTT:3855712                 | Marko Lewis, 12.7.1976, Abundant amongst rocks near snow beds. Upper Ambler river, ridge above Kowalskis Creek, Mt. 3950, 67°19'N, 156°59'W. Late snow bed on N. side of alpine ridge, wet or moist, 2000 ft                                                                                                    | CP-CM30382                                     |
| <i>Scapania praetervis</i> Meyl.                         | GBIF:4277193<br>OTT:7571327                 | Urmi, E. (1982): Schweiz, Kt. Grischnun, Lumbrein hart an der Gemeindegrenze oberhalb Schlareins, CH1903/LV03: 729.14 / 173.20, ca. 1750 müM, am Anstehenden (schattig), kalkarmes schieferiges Gestein mit Ausblühungen                                                                                        | Urmi-2161                                      |
| <i>Scapania scandica</i> (Arnell & H.Buch) Macvicar      | NCBI:1133317<br>GBIF:4277166<br>OTT:1062956 | Düll R. (1971): Schweiz, Kt. Uri, 8 km nördlich d. St. Gotthartpasses nahe d. Str. Grundgeb., ca 1570m<br>Urmi, E. (1999): Schweiz Kt. Ticino, Caviano Valle de S. Abbondio, CH1903/LV03: 704.40/106.98, ca. 850 müM, grasiger Felshang mit wenig Gebüsch, anstehender Silikatfels, z.T. mit etwas Feinmaterial | ZT-017155<br>Urmi-8376                         |
| <i>Scapania simmonsii</i> Bryhn & Kaal.                  | NCBI:537857<br>GBIF:4277140<br>OTT:133593   | Lewis, M. (1976): Upper Ambler River, 0.5 miles N. of Ulaneak Creek, base of Grey Mt. Tocky limestone slope<br>Kjeld Holmen, 15.7.1961, Alaska: Old John Lake, Lat. 68.08N, Long. 145 W, Alt 0m<br>CM-30384                                                                                                     | CP-CM30391                                     |
| <i>Scapania sphaerifera</i> H.Buch & Tuom.               | NCBI:537858<br>GBIF:5793125<br>OTT:133605   | Bakalin, V. (2010): Russian Far East. Primorsky Territory. Shkotovsky, District, Pidana Mt., N-facing slope in upper course of Oyry Stream. Merely dry boulders along stream in Picea-Abies forest, WGS84: 43.083N, 132.7E                                                                                      | TRH-B9515                                      |
| <i>Scapania spitsbergensis</i> (Lindb.) Müll.Frib.       | NCBI:537859<br>GBIF:8990537<br>OTT:133607   | Laine, T. (1966): Enontekiö Lapland, Enontekiö, Porojärvet, Ridnitsohka mountain, in alpine top area, between boulders, 1250m above sea level                                                                                                                                                                   | ZT-026-1966                                    |
| <i>Scapania subalpina</i> (Nees ex Lindenb.) Dumort.     | NCBI:248359<br>GBIF:4277176<br>OTT:831943   | Hürlimann (1947)<br>Hangartner, R. (2008): GR Medel (Lucmagn), ob Masauna, 710.60/170.65, 1720m, Felsen feuchter Glimmerschiefer<br>Hürlimann, H. (1975): Nasser Fels zwischen Restaurant und Staumauer Zervreila (Vals GR), ca. 1850müM                                                                        | Z-000129362<br>ZT-101909-159278<br>Z-000129211 |
| <i>Scapania tundrae</i> (Arnell) H.Buch                  | NCBI:537860<br>GBIF:8547629<br>OTT:707922   | Peters, K. (2020): Schweiz, auf Erde in Felsspalte, 46.08316087, 7.923246937, 2585m, +-5m<br>Sørensen, T. (1933): Liverpool Land: Cape Hope, Lat 70°28'N, Long: 220°25'W                                                                                                                                        | Peters-2020-23<br>CP-CM30429                   |
| <i>Scapania uliginosa</i> (Lindenb.) Dumort.             | NCBI:537861<br>GBIF:8368371<br>OTT:707920   | Urmi, E. (1984): Schweiz, Kt. Uri, Erstfeld Oberstafel (Riedberg), 691.18 / 183.94, ca. 1530 müM, saures Hangmoor, in Sphagnum-Polster                                                                                                                                                                          | Urmi-2825                                      |

|                                           |                                           |                                                                                                                                                                                                                                                                                                                                                                 |                                  |
|-------------------------------------------|-------------------------------------------|-----------------------------------------------------------------------------------------------------------------------------------------------------------------------------------------------------------------------------------------------------------------------------------------------------------------------------------------------------------------|----------------------------------|
| <i>Scapania umbrosa</i> (Schrad.) Dumort. | NCBI:537862<br>GBIF:4277183<br>OTT:707926 | Urmi, E. (1985): Schweiz, Nidwalden, Oberdorf oberhalb Wolfboden, CH1903+/LV95: 671.00 / 199.00, ca. 1340 müM, Lichter Fichtenwald an steilem Hang, auf totem Holz<br>Edwin Urmi, 26.8.1983, Schweiz, Kt. Bern, Lenk Iffigital bei der Iffigenalp, 599.88 / 138.6, ca. 1620 müM, im Fichtenwald, auf totem Baumstumpf<br>Urmi-2548                              | Urmi-3527                        |
| <i>Scapania undulata</i> (L.) Dumort.     | NCBI:215256<br>GBIF:2689218<br>OTT:812077 | Bertram, J. (1996): VS Ried-Mörel, Reservat Aletschwald, Mittlerer Aletschwald, 645.54/138.08, 1970m, kleines Bächlein in einem Tälchen mit <i>Alnetum viridis</i> -Bestand auf Steinen im Bach, z.T. submers bzw. überspült<br>Hürlimann, H. (1994): Fundort, Nasser schattiger Granitfels, Bondo GR im Bondasca-Tal bei Stauwehr-Brücke, 1080müM, 76370/13288 | Bertram-1898e<br>Hürlimann-94211 |
| <i>Scapania verrucosa</i> Heeg            | NCBI:537863<br>GBIF:8119128<br>OTT:707924 | Urmi, E. (1976): Italien, Piemonte, Prov. di Novara, Valstrona, am rechten Ufer des T. Strona westlich von Campello Monti, ret. ital.: fuso ovest 1440.8E / 5087.2 N, Bachböschung auf anstehendem Peridotit, ca 1320 müM<br>P. Culmann, 22.8.1920 CM-30381                                                                                                     | Urmi-1173                        |
| <i>Scapania zemliae</i> S.W.Arnell        | GBIF:7480007<br>OTT:7571345               | Holmen, K. (1958): From brooks below a glacier-tongue, Charcots Land: Lat 71°54'N, Long 29°W, Alt 850m                                                                                                                                                                                                                                                          | CP-CM30431                       |

115 **Table 1:** List of voucher specimens and fresh samples used in this study. All voucher  
 116 specimens have been investigated. The columns list the taxonomic species identifiers (*NCBI*,  
 117 *GBIF*, or *Open Tree of Life* identifiers, if available), the text on the specimen sleeves  
 118 (collector, date and text on the envelopes) and the voucher specimen identifiers (the first  
 119 letters either indicate the *Index Herbariorum* institution code<sup>56</sup> if available or the name of  
 120 private collection where the specimens were stored).

121

122 For microscopy, a Zeiss Axio Scope.A1 HAL 100/HBO, 6x HD/DIC, M27, 10x/23 microscope  
 123 with an achromatic-aplanatic 0.9 H D Ph DIC condenser was used with the objectives EC Plan  
 124 Neofluar 2.5x/0.075 M27 (a=8.8mm), Plan-Apochromat 5x/0.16 M27 (a=12.1mm), Plan-  
 125 Apochromat 10x/0.45 M27 (a=2.1mm), Plan-Apochromat 20x/0.8 M27 (a=0.55mm), and  
 126 Plan-Apochromat 40x/0.95 Korr M27 (a=0.25mm) using the EC PN and the Fluor 40x/1.30 III  
 127 and PA 40x/0.95 III filters for DIC. The conversion filter CB3 and the interference filter  
 128 wideband green were used to improve digital reproduction of colors. For macroscopy and for  
 129 preparing microscopy slides, a binocular microscope Zeiss Stemi 2000c was used  
 130 (apochromatic Greenough system with a stereo angle of 11° and 100/100 switchover of  
 131 camera and ocular viewing). For stand-alone macroscopic images, the objectives Canon MP-E  
 132 65mm 2.8 1-5x macro and Laowa 25mm 2.5-5.0x ultra-macro for Canon EF and the Canon  
 133 EF-RF adapter.

134

135 To acquire digital images, a full-frame, high-resolution camera (Canon EOS RP, 26 megapixel)  
 136 was used and adapted to the microscopes using binocular phototubes with sliding prism  
 137 30°/23 (Axio Scope.A1) and 100:0/0:100 reversed image (Stemi 2000c) using 60-T2 camera  
 138 adapter for Canon EOS and Canon EF-RF adapter. The objectives Canon MP-E and Laowa  
 139 25mm were adapted directly through the Canon EF-RF adapter.

140

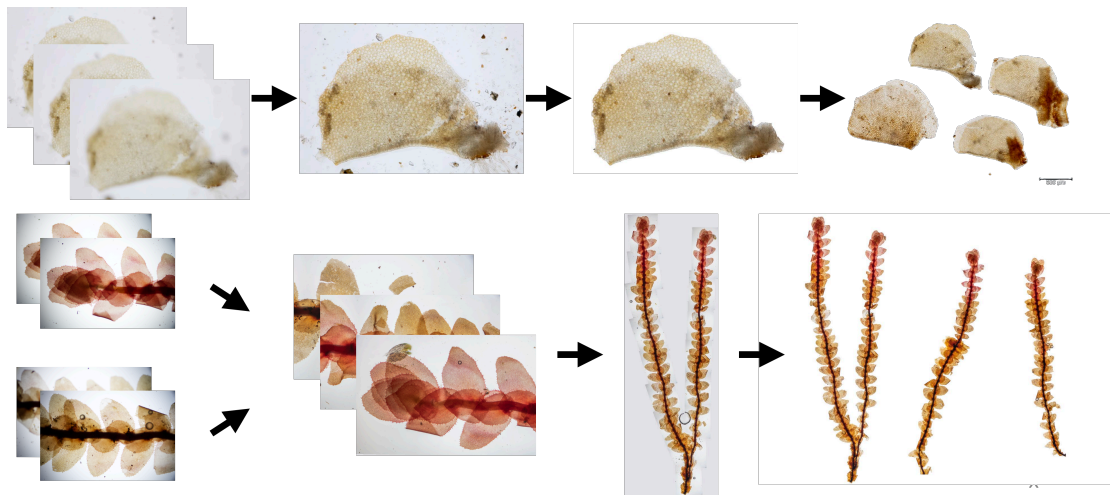

141

142

143

144

145

146

147

148

149

150

151

152

153

154

155

156

157

158

159

160

161

162

163

164

165

166

167

168

169

170

171

172

173

174

175

176

177

178

179

**Figure 1:** Two exemplary workflows used in this study to create segmented images. **(a)** Example of multi-focus image fusion where (1) several images of one object of a leaf lobe are fused into a (2) composite image. The leaf lobe as shown in the composite image is then (3) segmented and the background removed. Several leaf lobe objects are then put onto the (4) final image and a microscopic scale is applied. **(b)** Example of image stitching where (2) several fused images from (1) different segments of the same object are (3) stitched into a composite image with larger dimensions. Several of these stitched images are then put onto the (4) final image and a microscopic scale is applied.

To construct images with extended depth of field using computational methods, multiple images were recorded at different focal planes. This “focus stacking” approach was automatized for macroscopy by attaching the camera to a Cognisys StackShot macro rail fixed on a Novoflex macro stand, and for microscopy by adapting a Cognisys StackShot motor to the fine adjustment of the microscope using two cogged wheels, one small wheel (1 cm diameter) adapted on the motor and one large wheel (8.5 cm diameter) on the fine adjustment of the microscope. The two cogged wheels were coupled with a toothed belt to obtain very fine step increments of the stepping motor for high magnifications. A Cognisys StackShot controller was used to control the amount and distance of the stepping motor with the following controller settings: Dist/Rev: 3200 stp, Backlash: 0 steps, # pics: 1, Tsettle: 100.0 ms, Toff: 450.0 ms, Auto Return: yes, Speed: 3000 st/sec, Tlapse: off, Tpulse: 800.0 ms, Tramp: 100 ms, Units: steps, Torque: 6, Hi Precision: Off, LCD Backlight: 10, Mode: Auto-Step using between 25 steps (magnification 1x) and 50 steps (magnification 25x) and 100 steps (magnification 400x) (number of steps depending on aperture settings and effective magnification).

Raw images were recorded in CR3-format and pre-processed with Adobe Camera RAW. Non-destructive image processing such as corrections of the field curvature, removal of chromatic aberration, increase of contrast and brightness were performed in Adobe Camera RAW. Images were then exported to TIFF-format and any image processing steps were recorded in individual Adobe XMP-files.

Multi-focus image fusion was performed on the individual images in the z-stacks using the software Helicon Focus 7.7.5 and by choosing the algorithms *depth map* and *pyramid* with different settings of radius (4, 8, 16, 24) and smoothing (2, 4). The best composite image was chosen manually and retained. When composite images contained specimen that were larger than the frame, several images were stitched together using the *panorama stitching* function in the software Affinity Photo 1.10.1.

180 Images were manually segmented and interfering background removed using the *flood*  
 181 *select*, *brush selection* and *freehand selection* tools in the software Affinity Photo. In order to  
 182 determine the scale, a stage micrometre was photographed separately with any of the  
 183 objectives and microscope combinations. The scale was calculated per pixel for each  
 184 combination (File [scale\\_bar\\_distances.csv](#) in <sup>57</sup>) and scale bars were put post-hoc onto the  
 185 segmented images using the Python script [scale\\_bar.py](#)<sup>57</sup>.

186  
 187 Meta-data including species name, taxonomic rank information (NCBI-Taxon, GBIF and OTT  
 188 taxonomy identifiers), voucher specimen id, image acquisition date, an object description  
 189 including the name of the captured phenotypic attribute(s), the used objective, microscope,  
 190 and magnification were associated with any raw image based on unique respective file  
 191 names. Individual file names (variable *file list*), name within an image focus stack (variable  
 192 *stack name*) and name within an image stitching stack (variable *stitch name*) were recorded  
 193 additionally to facilitate subsequent automatized image processing in workflows. A Python  
 194 script was created to put individual images as part of image stacks into directories (File  
 195 [create\\_image\\_stacks.py](#) in <sup>58</sup>). The Python script parses the *Label* tag in the XMP-files. Any  
 196 meta-data regarding image enhancement and non-destructive image processing were  
 197 extracted from XMP-files using a simple Python script (File [xmp\\_stack\\_to\\_tsv.py](#) in <sup>58</sup>). The  
 198 meta-data was saved in individual TSV-files and merged using a helper Python script (File  
 199 [tsv\\_merge.py](#) in <sup>58</sup>). Table 2 lists all fields which were extracted from the XMP.  
 200

| Semantic identifier                                                                                       | Tag name                 |
|-----------------------------------------------------------------------------------------------------------|--------------------------|
| { <a href="http://www.w3.org/1999/02/22-rdf-syntax-ns#">http://www.w3.org/1999/02/22-rdf-syntax-ns#</a> } | about                    |
| { <a href="http://ns.adobe.com/xap/1.0/">http://ns.adobe.com/xap/1.0/</a> }                               | ModifyDate               |
| { <a href="http://ns.adobe.com/xap/1.0/">http://ns.adobe.com/xap/1.0/</a> }                               | CreateDate               |
| { <a href="http://ns.adobe.com/xap/1.0/">http://ns.adobe.com/xap/1.0/</a> }                               | MetadataDate             |
| { <a href="http://ns.adobe.com/xap/1.0/">http://ns.adobe.com/xap/1.0/</a> }                               | Rating                   |
| { <a href="http://ns.adobe.com/tiff/1.0/">http://ns.adobe.com/tiff/1.0/</a> }                             | Make                     |
| { <a href="http://ns.adobe.com/tiff/1.0/">http://ns.adobe.com/tiff/1.0/</a> }                             | Model                    |
| { <a href="http://ns.adobe.com/tiff/1.0/">http://ns.adobe.com/tiff/1.0/</a> }                             | Orientation              |
| { <a href="http://ns.adobe.com/tiff/1.0/">http://ns.adobe.com/tiff/1.0/</a> }                             | ImageWidth               |
| { <a href="http://ns.adobe.com/tiff/1.0/">http://ns.adobe.com/tiff/1.0/</a> }                             | ImageLength              |
| { <a href="http://ns.adobe.com/exif/1.0/">http://ns.adobe.com/exif/1.0/</a> }                             | ExifVersion              |
| { <a href="http://ns.adobe.com/exif/1.0/">http://ns.adobe.com/exif/1.0/</a> }                             | ExposureTime             |
| { <a href="http://ns.adobe.com/exif/1.0/">http://ns.adobe.com/exif/1.0/</a> }                             | ShutterSpeedValue        |
| { <a href="http://ns.adobe.com/exif/1.0/">http://ns.adobe.com/exif/1.0/</a> }                             | FNumber                  |
| { <a href="http://ns.adobe.com/exif/1.0/">http://ns.adobe.com/exif/1.0/</a> }                             | ApertureValue            |
| { <a href="http://ns.adobe.com/exif/1.0/">http://ns.adobe.com/exif/1.0/</a> }                             | ExposureProgram          |
| { <a href="http://ns.adobe.com/exif/1.0/">http://ns.adobe.com/exif/1.0/</a> }                             | SensitivityType          |
| { <a href="http://ns.adobe.com/exif/1.0/">http://ns.adobe.com/exif/1.0/</a> }                             | RecommendedExposureIndex |
| { <a href="http://ns.adobe.com/exif/1.0/">http://ns.adobe.com/exif/1.0/</a> }                             | ExposureBiasValue        |
| { <a href="http://ns.adobe.com/exif/1.0/">http://ns.adobe.com/exif/1.0/</a> }                             | MaxApertureValue         |
| { <a href="http://ns.adobe.com/exif/1.0/">http://ns.adobe.com/exif/1.0/</a> }                             | MeteringMode             |
| { <a href="http://ns.adobe.com/exif/1.0/">http://ns.adobe.com/exif/1.0/</a> }                             | FocalLength              |
| { <a href="http://ns.adobe.com/exif/1.0/">http://ns.adobe.com/exif/1.0/</a> }                             | CustomRendered           |
| { <a href="http://ns.adobe.com/exif/1.0/">http://ns.adobe.com/exif/1.0/</a> }                             | ExposureMode             |
| { <a href="http://ns.adobe.com/exif/1.0/">http://ns.adobe.com/exif/1.0/</a> }                             | WhiteBalance             |
| { <a href="http://ns.adobe.com/exif/1.0/">http://ns.adobe.com/exif/1.0/</a> }                             | SceneCaptureType         |
| { <a href="http://ns.adobe.com/exif/1.0/">http://ns.adobe.com/exif/1.0/</a> }                             | FocalPlaneXResolution    |
| { <a href="http://ns.adobe.com/exif/1.0/">http://ns.adobe.com/exif/1.0/</a> }                             | FocalPlaneYResolution    |
| { <a href="http://ns.adobe.com/exif/1.0/">http://ns.adobe.com/exif/1.0/</a> }                             | FocalPlaneResolutionUnit |
| { <a href="http://ns.adobe.com/exif/1.0/">http://ns.adobe.com/exif/1.0/</a> }                             | DateTimeOriginal         |
| { <a href="http://ns.adobe.com/exif/1.0/">http://ns.adobe.com/exif/1.0/</a> }                             | PixelXDimension          |
| { <a href="http://ns.adobe.com/exif/1.0/">http://ns.adobe.com/exif/1.0/</a> }                             | PixelYDimension          |
| { <a href="http://purl.org/dc/elements/1.1/">http://purl.org/dc/elements/1.1/</a> }                       | format                   |
| { <a href="http://ns.adobe.com/exif/1.0/aux/">http://ns.adobe.com/exif/1.0/aux/</a> }                     | SerialNumber             |
| { <a href="http://ns.adobe.com/exif/1.0/aux/">http://ns.adobe.com/exif/1.0/aux/</a> }                     | LensInfo                 |
| { <a href="http://ns.adobe.com/exif/1.0/aux/">http://ns.adobe.com/exif/1.0/aux/</a> }                     | Lens                     |
| { <a href="http://ns.adobe.com/exif/1.0/aux/">http://ns.adobe.com/exif/1.0/aux/</a> }                     | LensID                   |



|                                                                                                             |                                |
|-------------------------------------------------------------------------------------------------------------|--------------------------------|
| { <a href="http://ns.adobe.com/exif/1.0/aux/">http://ns.adobe.com/exif/1.0/aux/</a> }                       | LensSerialNumber               |
| { <a href="http://ns.adobe.com/exif/1.0/aux/">http://ns.adobe.com/exif/1.0/aux/</a> }                       | ImageNumber                    |
| { <a href="http://ns.adobe.com/exif/1.0/aux/">http://ns.adobe.com/exif/1.0/aux/</a> }                       | ApproximateFocusDistance       |
| { <a href="http://ns.adobe.com/exif/1.0/aux/">http://ns.adobe.com/exif/1.0/aux/</a> }                       | FlashCompensation              |
| { <a href="http://ns.adobe.com/exif/1.0/aux/">http://ns.adobe.com/exif/1.0/aux/</a> }                       | Firmware                       |
| { <a href="http://cipa.jp/exif/1.0/">http://cipa.jp/exif/1.0/</a> }                                         | LensModel                      |
| { <a href="http://ns.adobe.com/photoshop/1.0/">http://ns.adobe.com/photoshop/1.0/</a> }                     | DateCreated                    |
| { <a href="http://ns.adobe.com/photoshop/1.0/">http://ns.adobe.com/photoshop/1.0/</a> }                     | SidecarForExtension            |
| { <a href="http://ns.adobe.com/photoshop/1.0/">http://ns.adobe.com/photoshop/1.0/</a> }                     | EmbeddedXMPDigest              |
| { <a href="http://ns.adobe.com/xap/1.0/mm/">http://ns.adobe.com/xap/1.0/mm/</a> }                           | DocumentID                     |
| { <a href="http://ns.adobe.com/xap/1.0/mm/">http://ns.adobe.com/xap/1.0/mm/</a> }                           | PreservedFileName              |
| { <a href="http://ns.adobe.com/xap/1.0/mm/">http://ns.adobe.com/xap/1.0/mm/</a> }                           | OriginalDocumentID             |
| { <a href="http://ns.adobe.com/xap/1.0/mm/">http://ns.adobe.com/xap/1.0/mm/</a> }                           | InstanceID                     |
| { <a href="http://ns.adobe.com/camera-raw-settings/1.0/">http://ns.adobe.com/camera-raw-settings/1.0/</a> } | Version                        |
| { <a href="http://ns.adobe.com/camera-raw-settings/1.0/">http://ns.adobe.com/camera-raw-settings/1.0/</a> } | ProcessVersion                 |
| { <a href="http://ns.adobe.com/camera-raw-settings/1.0/">http://ns.adobe.com/camera-raw-settings/1.0/</a> } | WhiteBalance                   |
| { <a href="http://ns.adobe.com/camera-raw-settings/1.0/">http://ns.adobe.com/camera-raw-settings/1.0/</a> } | Temperature                    |
| { <a href="http://ns.adobe.com/camera-raw-settings/1.0/">http://ns.adobe.com/camera-raw-settings/1.0/</a> } | Tint                           |
| { <a href="http://ns.adobe.com/camera-raw-settings/1.0/">http://ns.adobe.com/camera-raw-settings/1.0/</a> } | Sharpness                      |
| { <a href="http://ns.adobe.com/camera-raw-settings/1.0/">http://ns.adobe.com/camera-raw-settings/1.0/</a> } | LuminanceSmoothing             |
| { <a href="http://ns.adobe.com/camera-raw-settings/1.0/">http://ns.adobe.com/camera-raw-settings/1.0/</a> } | ColorNoiseReduction            |
| { <a href="http://ns.adobe.com/camera-raw-settings/1.0/">http://ns.adobe.com/camera-raw-settings/1.0/</a> } | VignetteAmount                 |
| { <a href="http://ns.adobe.com/camera-raw-settings/1.0/">http://ns.adobe.com/camera-raw-settings/1.0/</a> } | ShadowTint                     |
| { <a href="http://ns.adobe.com/camera-raw-settings/1.0/">http://ns.adobe.com/camera-raw-settings/1.0/</a> } | RedHue                         |
| { <a href="http://ns.adobe.com/camera-raw-settings/1.0/">http://ns.adobe.com/camera-raw-settings/1.0/</a> } | RedSaturation                  |
| { <a href="http://ns.adobe.com/camera-raw-settings/1.0/">http://ns.adobe.com/camera-raw-settings/1.0/</a> } | GreenHue                       |
| { <a href="http://ns.adobe.com/camera-raw-settings/1.0/">http://ns.adobe.com/camera-raw-settings/1.0/</a> } | GreenSaturation                |
| { <a href="http://ns.adobe.com/camera-raw-settings/1.0/">http://ns.adobe.com/camera-raw-settings/1.0/</a> } | BlueHue                        |
| { <a href="http://ns.adobe.com/camera-raw-settings/1.0/">http://ns.adobe.com/camera-raw-settings/1.0/</a> } | BlueSaturation                 |
| { <a href="http://ns.adobe.com/camera-raw-settings/1.0/">http://ns.adobe.com/camera-raw-settings/1.0/</a> } | GrayMixerRed                   |
| { <a href="http://ns.adobe.com/camera-raw-settings/1.0/">http://ns.adobe.com/camera-raw-settings/1.0/</a> } | GrayMixerOrange                |
| { <a href="http://ns.adobe.com/camera-raw-settings/1.0/">http://ns.adobe.com/camera-raw-settings/1.0/</a> } | GrayMixerYellow                |
| { <a href="http://ns.adobe.com/camera-raw-settings/1.0/">http://ns.adobe.com/camera-raw-settings/1.0/</a> } | GrayMixerGreen                 |
| { <a href="http://ns.adobe.com/camera-raw-settings/1.0/">http://ns.adobe.com/camera-raw-settings/1.0/</a> } | GrayMixerAqua                  |
| { <a href="http://ns.adobe.com/camera-raw-settings/1.0/">http://ns.adobe.com/camera-raw-settings/1.0/</a> } | GrayMixerBlue                  |
| { <a href="http://ns.adobe.com/camera-raw-settings/1.0/">http://ns.adobe.com/camera-raw-settings/1.0/</a> } | GrayMixerPurple                |
| { <a href="http://ns.adobe.com/camera-raw-settings/1.0/">http://ns.adobe.com/camera-raw-settings/1.0/</a> } | GrayMixerMagenta               |
| { <a href="http://ns.adobe.com/camera-raw-settings/1.0/">http://ns.adobe.com/camera-raw-settings/1.0/</a> } | SplitToningShadowHue           |
| { <a href="http://ns.adobe.com/camera-raw-settings/1.0/">http://ns.adobe.com/camera-raw-settings/1.0/</a> } | SplitToningShadowSaturation    |
| { <a href="http://ns.adobe.com/camera-raw-settings/1.0/">http://ns.adobe.com/camera-raw-settings/1.0/</a> } | SplitToningHighlightHue        |
| { <a href="http://ns.adobe.com/camera-raw-settings/1.0/">http://ns.adobe.com/camera-raw-settings/1.0/</a> } | SplitToningHighlightSaturation |
| { <a href="http://ns.adobe.com/camera-raw-settings/1.0/">http://ns.adobe.com/camera-raw-settings/1.0/</a> } | SplitToningBalance             |
| { <a href="http://ns.adobe.com/camera-raw-settings/1.0/">http://ns.adobe.com/camera-raw-settings/1.0/</a> } | ParametricShadows              |
| { <a href="http://ns.adobe.com/camera-raw-settings/1.0/">http://ns.adobe.com/camera-raw-settings/1.0/</a> } | ParametricDarks                |
| { <a href="http://ns.adobe.com/camera-raw-settings/1.0/">http://ns.adobe.com/camera-raw-settings/1.0/</a> } | ParametricLights               |
| { <a href="http://ns.adobe.com/camera-raw-settings/1.0/">http://ns.adobe.com/camera-raw-settings/1.0/</a> } | ParametricHighlights           |
| { <a href="http://ns.adobe.com/camera-raw-settings/1.0/">http://ns.adobe.com/camera-raw-settings/1.0/</a> } | ParametricShadowSplit          |
| { <a href="http://ns.adobe.com/camera-raw-settings/1.0/">http://ns.adobe.com/camera-raw-settings/1.0/</a> } | ParametricMidtoneSplit         |
| { <a href="http://ns.adobe.com/camera-raw-settings/1.0/">http://ns.adobe.com/camera-raw-settings/1.0/</a> } | ParametricHighlightSplit       |
| { <a href="http://ns.adobe.com/camera-raw-settings/1.0/">http://ns.adobe.com/camera-raw-settings/1.0/</a> } | SharpenRadius                  |
| { <a href="http://ns.adobe.com/camera-raw-settings/1.0/">http://ns.adobe.com/camera-raw-settings/1.0/</a> } | SharpenDetail                  |
| { <a href="http://ns.adobe.com/camera-raw-settings/1.0/">http://ns.adobe.com/camera-raw-settings/1.0/</a> } | SharpenEdgeMasking             |
| { <a href="http://ns.adobe.com/camera-raw-settings/1.0/">http://ns.adobe.com/camera-raw-settings/1.0/</a> } | PostCropVignetteAmount         |
| { <a href="http://ns.adobe.com/camera-raw-settings/1.0/">http://ns.adobe.com/camera-raw-settings/1.0/</a> } | GrainAmount                    |
| { <a href="http://ns.adobe.com/camera-raw-settings/1.0/">http://ns.adobe.com/camera-raw-settings/1.0/</a> } | ColorNoiseReductionDetail      |
| { <a href="http://ns.adobe.com/camera-raw-settings/1.0/">http://ns.adobe.com/camera-raw-settings/1.0/</a> } | ColorNoiseReductionSmoothness  |
| { <a href="http://ns.adobe.com/camera-raw-settings/1.0/">http://ns.adobe.com/camera-raw-settings/1.0/</a> } | LensProfileEnable              |
| { <a href="http://ns.adobe.com/camera-raw-settings/1.0/">http://ns.adobe.com/camera-raw-settings/1.0/</a> } | LensManualDistortionAmount     |
| { <a href="http://ns.adobe.com/camera-raw-settings/1.0/">http://ns.adobe.com/camera-raw-settings/1.0/</a> } | PerspectiveVertical            |
| { <a href="http://ns.adobe.com/camera-raw-settings/1.0/">http://ns.adobe.com/camera-raw-settings/1.0/</a> } | PerspectiveHorizontal          |
| { <a href="http://ns.adobe.com/camera-raw-settings/1.0/">http://ns.adobe.com/camera-raw-settings/1.0/</a> } | PerspectiveRotate              |
| { <a href="http://ns.adobe.com/camera-raw-settings/1.0/">http://ns.adobe.com/camera-raw-settings/1.0/</a> } | PerspectiveScale               |
| { <a href="http://ns.adobe.com/camera-raw-settings/1.0/">http://ns.adobe.com/camera-raw-settings/1.0/</a> } | PerspectiveAspect              |
| { <a href="http://ns.adobe.com/camera-raw-settings/1.0/">http://ns.adobe.com/camera-raw-settings/1.0/</a> } | PerspectiveUpright             |

|                                                |                                     |
|------------------------------------------------|-------------------------------------|
| {http://ns.adobe.com/camera-raw-settings/1.0/} | PerspectiveX                        |
| {http://ns.adobe.com/camera-raw-settings/1.0/} | PerspectiveY                        |
| {http://ns.adobe.com/camera-raw-settings/1.0/} | AutoLateralCA                       |
| {http://ns.adobe.com/camera-raw-settings/1.0/} | Exposure2012                        |
| {http://ns.adobe.com/camera-raw-settings/1.0/} | Contrast2012                        |
| {http://ns.adobe.com/camera-raw-settings/1.0/} | Highlights2012                      |
| {http://ns.adobe.com/camera-raw-settings/1.0/} | Shadows2012                         |
| {http://ns.adobe.com/camera-raw-settings/1.0/} | Whites2012                          |
| {http://ns.adobe.com/camera-raw-settings/1.0/} | Blacks2012                          |
| {http://ns.adobe.com/camera-raw-settings/1.0/} | Clarity2012                         |
| {http://ns.adobe.com/camera-raw-settings/1.0/} | Dehaze                              |
| {http://ns.adobe.com/camera-raw-settings/1.0/} | Texture                             |
| {http://ns.adobe.com/camera-raw-settings/1.0/} | ToneMapStrength                     |
| {http://ns.adobe.com/camera-raw-settings/1.0/} | ConvertToGrayscale                  |
| {http://ns.adobe.com/camera-raw-settings/1.0/} | OverrideLookVignette                |
| {http://ns.adobe.com/camera-raw-settings/1.0/} | ToneCurveName                       |
| {http://ns.adobe.com/camera-raw-settings/1.0/} | ToneCurveName2012                   |
| {http://ns.adobe.com/camera-raw-settings/1.0/} | CameraProfile                       |
| {http://ns.adobe.com/camera-raw-settings/1.0/} | CameraProfileDigest                 |
| {http://ns.adobe.com/camera-raw-settings/1.0/} | LensProfileSetup                    |
| {http://ns.adobe.com/camera-raw-settings/1.0/} | LensProfileName                     |
| {http://ns.adobe.com/camera-raw-settings/1.0/} | LensProfileFilename                 |
| {http://ns.adobe.com/camera-raw-settings/1.0/} | LensProfileDigest                   |
| {http://ns.adobe.com/camera-raw-settings/1.0/} | LensProfileDistortionScale          |
| {http://ns.adobe.com/camera-raw-settings/1.0/} | LensProfileChromaticAberrationScale |
| {http://ns.adobe.com/camera-raw-settings/1.0/} | LensProfileVignettingScale          |
| {http://ns.adobe.com/camera-raw-settings/1.0/} | UprightVersion                      |
| {http://ns.adobe.com/camera-raw-settings/1.0/} | UprightCenterMode                   |
| {http://ns.adobe.com/camera-raw-settings/1.0/} | UprightCenterNormX                  |
| {http://ns.adobe.com/camera-raw-settings/1.0/} | UprightCenterNormY                  |
| {http://ns.adobe.com/camera-raw-settings/1.0/} | UprightFocalMode                    |
| {http://ns.adobe.com/camera-raw-settings/1.0/} | UprightFocalLength35mm              |
| {http://ns.adobe.com/camera-raw-settings/1.0/} | UprightPreview                      |
| {http://ns.adobe.com/camera-raw-settings/1.0/} | UprightDependentDigest              |
| {http://ns.adobe.com/camera-raw-settings/1.0/} | UprightTransformCount               |
| {http://ns.adobe.com/camera-raw-settings/1.0/} | UprightTransform_0                  |
| {http://ns.adobe.com/camera-raw-settings/1.0/} | UprightTransform_1                  |
| {http://ns.adobe.com/camera-raw-settings/1.0/} | UprightTransform_2                  |
| {http://ns.adobe.com/camera-raw-settings/1.0/} | UprightTransform_3                  |
| {http://ns.adobe.com/camera-raw-settings/1.0/} | UprightTransform_4                  |
| {http://ns.adobe.com/camera-raw-settings/1.0/} | UprightTransform_5                  |
| {http://ns.adobe.com/camera-raw-settings/1.0/} | UprightFourSegmentsCount            |
| {http://ns.adobe.com/camera-raw-settings/1.0/} | ToggleStyleDigest                   |
| {http://ns.adobe.com/camera-raw-settings/1.0/} | ToggleStyleAmount                   |
| {http://ns.adobe.com/camera-raw-settings/1.0/} | HasSettings                         |
| {http://ns.adobe.com/camera-raw-settings/1.0/} | CropTop                             |
| {http://ns.adobe.com/camera-raw-settings/1.0/} | CropLeft                            |
| {http://ns.adobe.com/camera-raw-settings/1.0/} | CropBottom                          |
| {http://ns.adobe.com/camera-raw-settings/1.0/} | CropRight                           |
| {http://ns.adobe.com/camera-raw-settings/1.0/} | CropAngle                           |
| {http://ns.adobe.com/camera-raw-settings/1.0/} | CropConstrainToWarp                 |
| {http://ns.adobe.com/camera-raw-settings/1.0/} | HasCrop                             |
| {http://ns.adobe.com/camera-raw-settings/1.0/} | AlreadyApplied                      |
| {http://ns.adobe.com/camera-raw-settings/1.0/} | RawFileName                         |
| {http://ns.adobe.com/camera-raw-settings/1.0/} | Saturation                          |
| {http://ns.adobe.com/camera-raw-settings/1.0/} | Vibrance                            |
| {http://ns.adobe.com/camera-raw-settings/1.0/} | HueAdjustmentRed                    |
| {http://ns.adobe.com/camera-raw-settings/1.0/} | HueAdjustmentOrange                 |
| {http://ns.adobe.com/camera-raw-settings/1.0/} | HueAdjustmentYellow                 |
| {http://ns.adobe.com/camera-raw-settings/1.0/} | HueAdjustmentGreen                  |
| {http://ns.adobe.com/camera-raw-settings/1.0/} | HueAdjustmentAqua                   |
| {http://ns.adobe.com/camera-raw-settings/1.0/} | HueAdjustmentBlue                   |
| {http://ns.adobe.com/camera-raw-settings/1.0/} | HueAdjustmentPurple                 |
| {http://ns.adobe.com/camera-raw-settings/1.0/} | HueAdjustmentMagenta                |

|                                                                                                             |                             |
|-------------------------------------------------------------------------------------------------------------|-----------------------------|
| { <a href="http://ns.adobe.com/camera-raw-settings/1.0/">http://ns.adobe.com/camera-raw-settings/1.0/</a> } | SaturationAdjustmentRed     |
| { <a href="http://ns.adobe.com/camera-raw-settings/1.0/">http://ns.adobe.com/camera-raw-settings/1.0/</a> } | SaturationAdjustmentOrange  |
| { <a href="http://ns.adobe.com/camera-raw-settings/1.0/">http://ns.adobe.com/camera-raw-settings/1.0/</a> } | SaturationAdjustmentYellow  |
| { <a href="http://ns.adobe.com/camera-raw-settings/1.0/">http://ns.adobe.com/camera-raw-settings/1.0/</a> } | SaturationAdjustmentGreen   |
| { <a href="http://ns.adobe.com/camera-raw-settings/1.0/">http://ns.adobe.com/camera-raw-settings/1.0/</a> } | SaturationAdjustmentAqua    |
| { <a href="http://ns.adobe.com/camera-raw-settings/1.0/">http://ns.adobe.com/camera-raw-settings/1.0/</a> } | SaturationAdjustmentBlue    |
| { <a href="http://ns.adobe.com/camera-raw-settings/1.0/">http://ns.adobe.com/camera-raw-settings/1.0/</a> } | SaturationAdjustmentPurple  |
| { <a href="http://ns.adobe.com/camera-raw-settings/1.0/">http://ns.adobe.com/camera-raw-settings/1.0/</a> } | SaturationAdjustmentMagenta |
| { <a href="http://ns.adobe.com/camera-raw-settings/1.0/">http://ns.adobe.com/camera-raw-settings/1.0/</a> } | LuminanceAdjustmentRed      |
| { <a href="http://ns.adobe.com/camera-raw-settings/1.0/">http://ns.adobe.com/camera-raw-settings/1.0/</a> } | LuminanceAdjustmentOrange   |
| { <a href="http://ns.adobe.com/camera-raw-settings/1.0/">http://ns.adobe.com/camera-raw-settings/1.0/</a> } | LuminanceAdjustmentYellow   |
| { <a href="http://ns.adobe.com/camera-raw-settings/1.0/">http://ns.adobe.com/camera-raw-settings/1.0/</a> } | LuminanceAdjustmentGreen    |
| { <a href="http://ns.adobe.com/camera-raw-settings/1.0/">http://ns.adobe.com/camera-raw-settings/1.0/</a> } | LuminanceAdjustmentAqua     |
| { <a href="http://ns.adobe.com/camera-raw-settings/1.0/">http://ns.adobe.com/camera-raw-settings/1.0/</a> } | LuminanceAdjustmentBlue     |
| { <a href="http://ns.adobe.com/camera-raw-settings/1.0/">http://ns.adobe.com/camera-raw-settings/1.0/</a> } | LuminanceAdjustmentPurple   |
| { <a href="http://ns.adobe.com/camera-raw-settings/1.0/">http://ns.adobe.com/camera-raw-settings/1.0/</a> } | LuminanceAdjustmentMagenta  |
| { <a href="http://ns.adobe.com/camera-raw-settings/1.0/">http://ns.adobe.com/camera-raw-settings/1.0/</a> } | DefringePurpleAmount        |
| { <a href="http://ns.adobe.com/camera-raw-settings/1.0/">http://ns.adobe.com/camera-raw-settings/1.0/</a> } | DefringePurpleHueLo         |
| { <a href="http://ns.adobe.com/camera-raw-settings/1.0/">http://ns.adobe.com/camera-raw-settings/1.0/</a> } | DefringePurpleHueHi         |
| { <a href="http://ns.adobe.com/camera-raw-settings/1.0/">http://ns.adobe.com/camera-raw-settings/1.0/</a> } | DefringeGreenAmount         |
| { <a href="http://ns.adobe.com/camera-raw-settings/1.0/">http://ns.adobe.com/camera-raw-settings/1.0/</a> } | DefringeGreenHueLo          |
| { <a href="http://ns.adobe.com/camera-raw-settings/1.0/">http://ns.adobe.com/camera-raw-settings/1.0/</a> } | DefringeGreenHueHi          |
| { <a href="http://ns.adobe.com/xap/1.0/">http://ns.adobe.com/xap/1.0/</a> }                                 | Label                       |
| { <a href="http://ns.adobe.com/camera-raw-settings/1.0/">http://ns.adobe.com/camera-raw-settings/1.0/</a> } | VignetteMidpoint            |

201 **Table 2:** List of semantic identifiers used to annotate the image-enhancement performed in  
202 Adobe Camera-RAW.

203  
204 Raw camera and pre-processed imaging data in CR3 and TIFF format, respectively, were  
205 uploaded to BioStudies using the command line IBM Aspera software tool *ascp* version  
206 3.8.1.161274 to ensure that data has been transmitted without errors. Sparse file check  
207 summing was enabled to ensure integrity of files during transfer (parameter *-k 2*). The raw  
208 bioimaging data is available under the BioStudies identifier [S-BIAD188](#).

209

| Semantic identifier                                                                                                                                               | Name                 |
|-------------------------------------------------------------------------------------------------------------------------------------------------------------------|----------------------|
| { <a href="http://edamontology.org/data_1060">http://edamontology.org/data_1060</a> }                                                                             | File base name       |
| { <a href="http://rs.tdwg.org/dwc/terms/acceptedScientificName">http://rs.tdwg.org/dwc/terms/acceptedScientificName</a> }                                         | Species name         |
| { <a href="http://rs.tdwg.org/dwc/terms/TaxonID">http://rs.tdwg.org/dwc/terms/TaxonID</a> }                                                                       | TaxonID              |
| { <a href="http://rs.tdwg.org/dwc/terms/measurementMethod">http://rs.tdwg.org/dwc/terms/measurementMethod</a> }                                                   | Measurement Method   |
| { <a href="http://www.openmicroscopy.org/rdf/2016-06/ome_core/Instrument">http://www.openmicroscopy.org/rdf/2016-06/ome_core/Instrument</a> }                     | Microscope           |
| { <a href="http://www.openmicroscopy.org/rdf/2016-06/ome_core/nominalMagnification">http://www.openmicroscopy.org/rdf/2016-06/ome_core/nominalMagnification</a> } | Magnification        |
| { <a href="http://www.openmicroscopy.org/rdf/2016-06/ome_core/ContrastMethod">http://www.openmicroscopy.org/rdf/2016-06/ome_core/ContrastMethod</a> }             | Contrast             |
| { <a href="http://www.openmicroscopy.org/rdf/2016-06/ome_core/Objective">http://www.openmicroscopy.org/rdf/2016-06/ome_core/Objective</a> }                       | Microscope Objective |
| { <a href="http://rs.tdwg.org/dwc/terms/basisOfRecord">http://rs.tdwg.org/dwc/terms/basisOfRecord</a> }                                                           | Basis of Record      |
| { <a href="http://rs.tdwg.org/dwc/terms/PreservedSpecimen">http://rs.tdwg.org/dwc/terms/PreservedSpecimen</a> }                                                   | Voucher specimen     |
| { <a href="http://rs.tdwg.org/dwc/terms/EarliestDateCollected">http://rs.tdwg.org/dwc/terms/EarliestDateCollected</a> }                                           | Collection Date      |
| { <a href="http://rs.tdwg.org/dwc/terms/recordedBy">http://rs.tdwg.org/dwc/terms/recordedBy</a> }                                                                 | Collector            |
| { <a href="http://rs.tdwg.org/dwc/terms/identifiedBy">http://rs.tdwg.org/dwc/terms/identifiedBy</a> }                                                             | Determined           |
| { <a href="http://rs.tdwg.org/dwc/terms/geodeticDatum">http://rs.tdwg.org/dwc/terms/geodeticDatum</a> }                                                           | Geodetic datum       |
| { <a href="http://www.ebi.ac.uk/efo/EFO_0005020">http://www.ebi.ac.uk/efo/EFO_0005020</a> }                                                                       | Latitude             |
| { <a href="http://www.ebi.ac.uk/efo/EFO_0005021">http://www.ebi.ac.uk/efo/EFO_0005021</a> }                                                                       | Longitude            |
| { <a href="http://rs.tdwg.org/dwc/terms/verbatimElevation">http://rs.tdwg.org/dwc/terms/verbatimElevation</a> }                                                   | Elevation            |
| { <a href="http://rs.tdwg.org/dwc/terms/coordinatePrecision">http://rs.tdwg.org/dwc/terms/coordinatePrecision</a> }                                               | Precision            |
| { <a href="http://purl.obolibrary.org/obo/OBI_0001048">http://purl.obolibrary.org/obo/OBI_0001048</a> }                                                           | Camera               |

210 **Table 3:** List of semantic terms used to annotate the segmented images.

211

212 Pre-processed images were converted to the Bio-Formats OME-TIFF format<sup>59</sup> by creating  
213 intermediate ZARR-pyramid tiles using the [bioformats2raw](#) converter version 0.4.0 and then  
214 using the [raw2ometiff](#) version 0.3.0 software tool to create the final pyramid images. In  
215 order to improve data reuse and to enable linking bioimaging data to ecological data  
216 repositories, individual fully segmented and processed images were associated with

217 standardised geolocation information. Swiss Topo CH1903/LV03 coordinates were converted  
218 to WGS84 using Swisstopo-WGS84-LV03<sup>60</sup>. The processed images were further associated  
219 with the meta-data information listed in Table 3. A helper script was implemented in R to  
220 facilitate the generation of TSV tables for data upload to the Image Data Resource (IDR)  
221 repository ( [tsv\\_res\\_2\\_idr.r](#) in <sup>61</sup>). Processed images and the meta-data aggregated in a TSV  
222 table were uploaded to IDR using the software Globus Connect Personal 3.1.6. The dataset is  
223 available under the identifier [idr0134](#).

224

225

226

## 227 Data Records

228 Two separate data records were created in order to enable rapid use of the data in machine  
229 learning and biodiversity approaches.

230 (1) The camera raw images (Canon CR3-format), the pre-processed images (16-bit TIFF-  
231 format), and the contextual meta-data were deposited in BioStudies under the identifier S-  
232 BIAD188 (<https://www.ebi.ac.uk/biostudies/studies/S-BIAD188>). The data record consists of  
233 a total of 223'989 individual raw image files partitioned into 48 species. The entire data  
234 record has a total size of approx. 12 TB.

235 (2) The pre-processed and fully segmented and processed images along with meta-data were  
236 deposited in OME-TIFF and JPEG-format, respectively, in the Image Data Resource (IDR)  
237 repository under the identifier idr0134

238 (<https://idr.openmicroscopy.org/search/?query=Name:134>). The data record consists of a  
239 total of 4233 pre-processed and 905 fully processed imaged files. The data record has a total  
240 size of approx. 14 TB.

241

242

243

## 244 Technical Validation

245 Biological validation of species identity and visible phenotypic attributes in the pre-processed  
246 images were performed by consulting the external experts Edwin Urmi, Heike Hofmann,  
247 Vadim Bakalin and Kristian Hassel. Photos of the herbarium specimen CM-30377 originating  
248 from North America (Table 1) show quite different properties when compared to the  
249 voucher specimen B-108428 originating from Northern Europe. Hence, the taxonomic status  
250 of the species *Scapania glaucocephala* is not yet fully clear<sup>15</sup>. Photos of CM-30377 may, thus,  
251 relate to the species *Scapania scapanioides* (C.Massal.) Grolle, which is listed in <sup>7</sup> as separate  
252 species occurring in Europe. Further, *S. brevicaulis* and *S. degenii* may comprise  
253 taxonomically identical species and additional research is needed to resolve their  
254 phylogenetic status. Images from this study can help the to clarify relationships of  
255 phenotypic attributes and the phylogenetic and taxonomic status of cryptic species.

256

257 To validate the technical quality of fused composite images, multi-focused image fusion  
258 methods were applied with different settings to the individual images in stacks. Composite  
259 images were manually inspected and the best image retained. Generally, classic Laplacian  
260 pyramid transform-based methods such as *Pyramid Maximum Contrast* implemented in the  
261 software Helicon Focus produce good results in complex cases with regard to intersecting  
262 objects, edges and many images, but these algorithms increase contrast and glare and they  
263 are prone to noise and artefacts and generally are considered less accurate regarding  
264 reproduction of microscopic objects<sup>62-65</sup>. The deterministic depth map-based method  
265 implemented in Helicon Focus first calculates depth maps from intermediary images based  
266 on the absolute difference in brightness of corresponding pixels in the source images and  
267 smoothed intermediary images and then generates the composite image from the source  
268 image pixels with indices differing from the indices in the smoothed depth map<sup>66</sup>. Whereas

269 larger values for the parameter *radius* increase blur along edges, lower values can introduce  
270 artefacts, while the amount of blur along the transition between fused areas of individual  
271 images can be controlled with the parameter *smoothing*. While the depth map-based  
272 method generally produces accurate reproductions of microscopic objects, in some  
273 circumstances and especially with high magnifications, it can generate visible and large  
274 artefacts and blur around the edges (boundary regions) (Fig. 2). Recently, machine learning-  
275 based methods have been applied to focus-based image fusion tasks that may be superior to  
276 deterministic approaches<sup>36</sup>. Although there have been proposed some algorithms specifically  
277 for microscopic imaging, there is a considerable lack of usable implementations and a lack of  
278 microscopic training data for machine learning-based algorithms<sup>36</sup>.  
279

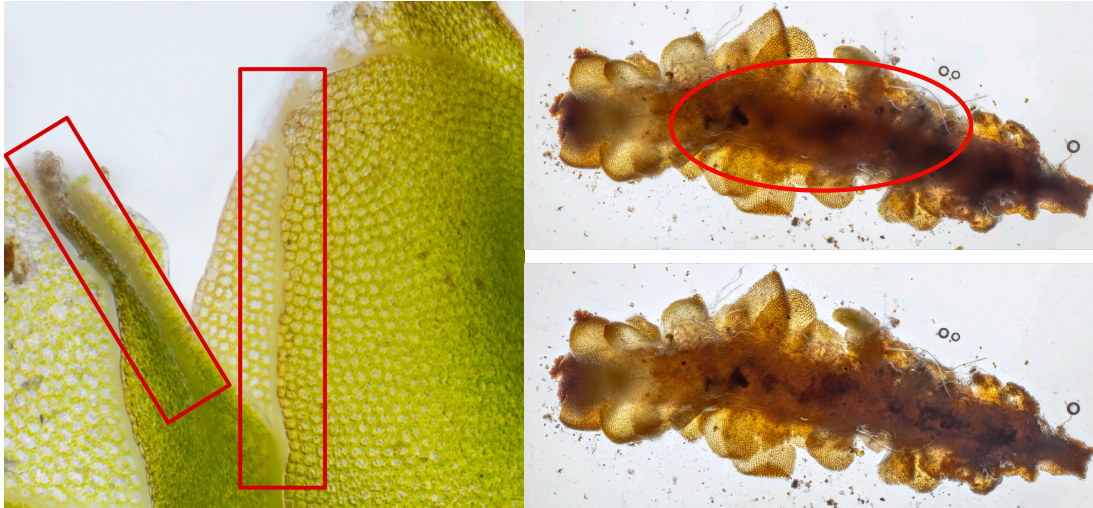

280  
281 **Figure 2:** Deficiencies of multi-focus image fusion methods. Red circles and bars were drawn  
282 *post-hoc* with Affinity Photo to indicate the deficient regions in the images, thus, the regions  
283 where multi-focus image fusion methods can produce blur and artefacts in composite  
284 images of microscopic objects. **(a)** Crop of *IMG\_1532-1621 Scapania cuspiduligera stature*  
285 *ventral side*. Visible blur along edges (boundary regions) of overlapping leaves (Parameter  
286 settings: *Method: Depth Map, Radius: 8, Smoothing: 4*). **(b)** *IMG\_0107-0226 Scapania*  
287 *ligulifolia stature dorsal side* (Parameter settings: *Method: Depth Map, Radius: 32,*  
288 *Smoothing: 20*).

289  
290 In order to facilitate the automatic processing of images, Python scripts have been written  
291 which are available as Open Source software in github<sup>57,58</sup>. These scripts use meta-data  
292 information to put individual images into image stacks to perform focus-based image fusion  
293 and image stitching tasks. Most of the work has been implemented manually. Scientific  
294 workflows allow to fully automate the entire process combining images with software tools  
295 utilising the machine-actionable information contained in the meta-data<sup>42,48,67</sup>. Meta-data  
296 has been validated using procedures described in<sup>20,45,46</sup> and standardised vocabularies were  
297 following the FAIR guiding principles<sup>1</sup>. When improved algorithms have been developed, the  
298 entire pipeline can be re-run resulting in improved segmented images without any further  
299 intervention. This data reuse and the rich documentation in meta-data will result in foster  
300 good scientific practices through source tracking and provenance.

301  
302  
303  
304

## 305 Usage Notes

306 Raw camera and pre-processed imaging data, the fully segmented and processed images,  
307 and the meta-data are available under the terms of the license Creative Commons CC BY 4.0.

308 Open-Source software scripts and code<sup>57,58</sup> are available under the terms of the BSD 3-Clause  
309 license.

310

## 311 Code Availability

312 Software code and scripts used in this study are available as Open Source in github:  
313 [https://github.com/korseby/create\\_image\\_stacks](https://github.com/korseby/create_image_stacks)<sup>58</sup>, [https://github.com/korseby/scale\\_bar](https://github.com/korseby/scale_bar)  
314 <sup>57</sup>, [https://github.com/korseby/bioimage\\_submission](https://github.com/korseby/bioimage_submission)<sup>61</sup>. Python scripts were tested under  
315 Python 3.7 and require the additional modules PIL, pandas, xml, csv, errno, sys, os, argparse,  
316 glob, pathlib and re. R scripts were tested under R 4.1.3 and require the additional packages  
317 parallel, foreach, and doMC. Shell scripts were tested using Bourne Again Shell (bash) 5.1.16.

318

319

320

## 321 Acknowledgements

322 KP acknowledges the support of iDiv (funded by the German Research Foundation, DFG-FZT  
323 118, 202548816) and Swissbryophytes. Fully segmented and processed images of 27  
324 *Scapania* species occurring in Switzerland were originally produced for the website  
325 <http://www.swissbryophytes.ch> and are also available at the Zurich Open Repository Archive  
326 <sup>68–71,71–93</sup>. We would also like to thank the external experts Edwin Urmi, Heike Hofmann,  
327 Vadim Bakalin and Kristian Hassel for providing voucher specimens and for performing  
328 validation of species identities on images of visible traits and especially Edwin Urmi for help  
329 with identification of fresh samples.

330

331

332

## 333 Author contributions

334 KP performed the entire study. BKR supervised the study.

335

336

337

## 338 Competing interests

339 No competing interests.

340

341

342

## 343 References

- 344 1. Wilkinson, M. D. *et al.* The FAIR Guiding Principles for scientific data management and  
345 stewardship. *Scientific Data* **3**, 160018 (2016).
- 346 2. Ellenberg, J. *et al.* A call for public archives for biological image data. *Nat Methods* **15**,  
347 849–854 (2018).
- 348 3. Löffler, F., Wesp, V., König-Ries, B. & Klan, F. Dataset search in biodiversity research: Do  
349 metadata in data repositories reflect scholarly information needs? *PLoS ONE* **16**,  
350 e0246099 (2021).
- 351 4. Asakawa, Y., Ludwiczuk, A. & Nagashima, F. Phytochemical and biological studies of  
352 bryophytes. *Phytochemistry* **91**, 52–80 (2013).
- 353 5. He, X., Sun, Y. & Zhu, R.-L. The Oil Bodies of Liverworts: Unique and Important Organelles  
354 in Land Plants. *Critical Reviews in Plant Sciences* **32**, 293–302 (2013).
- 355 6. Kanazawa, T. *et al.* The liverwort oil body is formed by redirection of the secretory  
356 pathway. *Nat Commun* **11**, 6152 (2020).

- 357 7. Hodgetts, N. G. *et al.* An annotated checklist of bryophytes of Europe, Macaronesia and  
358 Cyprus. *Journal of Bryology* **42**, 1–116 (2020).
- 359 8. Spitale, D. Switch between competition and facilitation within a seasonal scale at colony  
360 level in bryophytes. *Oecologia* **160**, 471–482 (2009).
- 361 9. Andersen, N. H. *et al.* Sesquiterpenes of nine european liverworts from the genera,  
362 *Anastrepta*, *bazzania*, *jungermannia*, *lepidozia* and *Scapania*. *Phytochemistry* **16**, 1731–  
363 1751 (1977).
- 364 10. Guo, L. *et al.* Chemical Composition, Antifungal and Antitumor Properties of Ether  
365 Extracts of *Scapania verrucosa* Heeg. and its Endophytic Fungus *Chaetomium fusiforme*.  
366 *Molecules* **13**, 2114–2125 (2008).
- 367 11. Bukvicki, D. R. *et al.* Assessment of the Chemical Composition and *In Vitro* Antimicrobial  
368 Potential of Extracts of the Liverwort *Scapania Aspera*. *Natural Product Communications*  
369 **8**, 1934578X1300800 (2013).
- 370 12. Han, J. *et al.* Terpenoids from Chinese Liverworts *Scapania* spp. *J. Nat. Prod.* **84**, 1210–  
371 1215 (2021).
- 372 13. Vázquez, M. D., López, J. & Carballeira, A. Uptake of Heavy Metals to the Extracellular  
373 and Intracellular Compartments in Three Species of Aquatic Bryophyte. *Ecotoxicology*  
374 *and Environmental Safety* **44**, 12–24 (1999).
- 375 14. Samecka-Cymerman, A., Kolon, K. & Kempers, A. J. Heavy Metals in Aquatic Bryophytes  
376 from the Ore Mountains (Germany). *Ecotoxicology and Environmental Safety* **52**, 203–  
377 210 (2002).
- 378 15. Heinrichs, J. *et al.* A phylogeny of the northern temperate leafy liverwort genus *Scapania*  
379 (*Scapaniaceae*, *Jungermanniales*). *Molecular Phylogenetics and Evolution* **62**, 973–985  
380 (2012).
- 381 16. Vana, J., Hentschel, J., Müller, J. & Heinrichs, J. Taxonomic novelties in *Scapania*.  
382 *PHYTOKEYS* **10**, 13 (2012).
- 383 17. Choi, S. S., Min, J., Kwon, W. & Park, J. The complete mitochondrial genome of *Scapania*  
384 *ampliata* Steph., 1897 (*Scapaniaceae*, *Jungermanniales*). *Mitochondrial DNA Part B* **6**,  
385 686–688 (2021).
- 386 18. Choi, S. S., Bakalin, V. A., Kwon, W. & Park, J. The complete mitochondrial genome of  
387 *Douinia plicata* (Lindb.) Konstant. *et. Vilnet* (*Scapaniaceae*, *Jungermanniales*).  
388 *Mitochondrial DNA Part B* **6**, 789–791 (2021).
- 389 19. Bernhardt-Römermann, M., Poschlod, P. & Hentschel, J. BryForTrait - A life-history trait  
390 database of forest bryophytes. *J Veg Sci* **29**, 798–800 (2018).
- 391 20. Schneider, F. D. *et al.* Towards an ecological trait-data standard. *Methods Ecol Evol* **10**,  
392 2006–2019 (2019).
- 393 21. Kommineni, V. K. *et al.* Comprehensive leaf size traits dataset for seven plant species  
394 from digitised herbarium specimen images covering more than two centuries. *BDJ* **9**,  
395 e69806 (2021).
- 396 22. Meijering, E., Carpenter, A. E., Peng, H., Hamprecht, F. A. & Olivo-Marin, J.-C. Imagining  
397 the future of bioimage analysis. *Nat Biotechnol* **34**, 1250–1255 (2016).
- 398 23. Cornelissen, J. H. C., Lang, S. I., Soudzilovskaia, N. A. & During, H. J. Comparative  
399 Cryptogam Ecology: A Review of Bryophyte and Lichen Traits that Drive  
400 Biogeochemistry. *Annals of Botany* **99**, 987–1001 (2007).
- 401 24. Díaz, S. *et al.* The global spectrum of plant form and function. *Nature* **529**, 167–171  
402 (2016).
- 403 25. Brodribb, T. J., Carriquí, M., Delzon, S., McAdam, S. A. M. & Holbrook, N. M. Advanced  
404 vascular function discovered in a widespread moss. *Nat. Plants* **6**, 273–279 (2020).
- 405 26. Duckett, J. G. & Pressel, S. Of mosses and vascular plants. *Nat. Plants* **6**, 184–185 (2020).
- 406 27. Horn, A. *et al.* Natural Products from Bryophytes: From Basic Biology to Biotechnological  
407 Applications. 28.

- 408 28. Schindel, D. E. & Cook, J. A. The next generation of natural history collections. *PLoS Biol*  
409 **16**, e2006125 (2018).
- 410 29. Hedrick, B. P. *et al.* Digitization and the Future of Natural History Collections. *BioScience*  
411 **70**, 243–251 (2020).
- 412 30. Gurevitch, J., Koricheva, J., Nakagawa, S. & Stewart, G. Meta-analysis and the science of  
413 research synthesis. *Nature* **555**, 175–182 (2018).
- 414 31. Valdecasas, A. G., Marshall, D., Becerra, J. M. & Terrero, J. J. On the extended depth of  
415 focus algorithms for bright-field microscopy. *11* (2001).
- 416 32. Goldsmith, N. T. DEEP FOCUS; A DIGITAL IMAGE PROCESSING TECHNIQUE TO PRODUCE  
417 IMPROVED FOCAL DEPTH IN LIGHT MICROSCOPY. *Image Anal Stereol* **19**, 163 (2011).
- 418 33. Nasibov, A., Nasibov, H. & Hacizade, F. Seamless image stitching algorithm using  
419 radiometric lens calibration for high resolution optical microscopy. in *2009 Fifth  
420 International Conference on Soft Computing, Computing with Words and Perceptions in  
421 System Analysis, Decision and Control* 1–4 (IEEE, 2009).  
422 doi:10.1109/ICSCCW.2009.5379500.
- 423 34. Wang, Z. & Yang, Z. Review on image-stitching techniques. *Multimedia Systems* **26**, 413–  
424 430 (2020).
- 425 35. Piper, J. Software-Based Stacking Techniques to Enhance Depth of Field and Dynamic  
426 Range in Digital Photomicrography. in *Histology Protocols* (eds. Hewitson, T. D. & Darby,  
427 I. A.) vol. 611 193–210 (Humana Press, 2010).
- 428 36. Liu, Y., Wang, L., Cheng, J., Li, C. & Chen, X. Multi-focus image fusion: A Survey of the  
429 state of the art. *Information Fusion* **64**, 71–91 (2020).
- 430 37. Jianchao Yang, Wright, J., Huang, T. S., & Yi Ma. Image Super-Resolution Via Sparse  
431 Representation. *IEEE Trans. on Image Process.* **19**, 2861–2873 (2010).
- 432 38. Yin, H., Li, S. & Fang, L. Simultaneous image fusion and super-resolution using sparse  
433 representation. *Information Fusion* **14**, 229–240 (2013).
- 434 39. Yu, Z., Liu, S., Zhu, D., Kuang, C. & Liu, X. Parallel detecting super-resolution microscopy  
435 using correlation based image restoration. *Optics Communications* **404**, 139–146 (2017).
- 436 40. Yang, B., Zhong, J., Li, Y. & Chen, Z. Multi-focus image fusion and super-resolution with  
437 convolutional neural network. *Int. J. Wavelets Multiresolut Inf. Process.* **15**, 1750037  
438 (2017).
- 439 41. Peters, K. *et al.* PhenoMeNal: processing and analysis of metabolomics data in the cloud.  
440 *GigaScience* **8**, (2019).
- 441 42. Goble, C. *et al.* FAIR Computational Workflows. *Data Intelligence* **2**, 108–121 (2020).
- 442 43. Atkinson, M., Gesing, S., Montagnat, J. & Taylor, I. Scientific workflows: Past, present and  
443 future. *Future Generation Computer Systems* **75**, 216–227 (2017).
- 444 44. Miksa, T., Simms, S., Mietchen, D. & Jones, S. Ten principles for machine-actionable data  
445 management plans. *PLoS Comput Biol* **15**, e1006750 (2019).
- 446 45. Samuel, S., Taubert, F., Walther, D., König-Ries, B. & Bücker, H. M. Towards  
447 Reproducibility of Microscopy Experiments. *D-Lib Magazine* **23**, (2017).
- 448 46. Kunis, S. *et al.* MDEmic: a metadata annotation tool to facilitate management of FAIR  
449 image data in the bioimaging community. *Nat Methods* (2021) doi:10.1038/s41592-021-  
450 01288-z.
- 451 47. Samuel, S. & König-Ries, B. End-to-End provenance representation for the  
452 understandability and reproducibility of scientific experiments using a semantic  
453 approach. *J Biomed Semant* **13**, 1 (2022).
- 454 48. Wratten, L., Wilm, A. & Göke, J. Reproducible, scalable, and shareable analysis pipelines  
455 with bioinformatics workflow managers. *Nat Methods* **18**, 1161–1168 (2021).
- 456 49. Hansen, O. L. P. *et al.* Species-level image classification with convolutional neural  
457 network enables insect identification from habitus images. *Ecol Evol* **10**, 737–747 (2020).
- 458 50. Høye, T. T. *et al.* Deep learning and computer vision will transform entomology. *Proc  
459 Natl Acad Sci USA* **118**, e2002545117 (2021).



- 460 51. König, C. *et al.* Biodiversity data integration—the significance of data resolution and  
461 domain. *PLoS Biol* **17**, e3000183 (2019).
- 462 52. Nelson, G. & Paul, D. L. DiSSCo, iDigBio and the Future of Global Collaboration. *BISS* **3**,  
463 e37896 (2019).
- 464 53. Culina, A. *et al.* Navigating the unfolding open data landscape in ecology and evolution.  
465 *Nat Ecol Evol* **2**, 420–426 (2018).
- 466 54. Seltzer, C. Making Biodiversity Data Social, Shareable, and Scalable: Reflections on  
467 iNaturalist & citizen science. *BISS* **3**, e46670 (2019).
- 468 55. Borgman, C. L. & Bourne, P. E. Why it takes a village to manage and share data. 20.
- 469 56. Holmgren, P. K. & Holmgren, N. H. INDEX HERBARIORUM. *TAXON* **40**, 687–692 (1991).
- 470 57. Peters, K. *korseby/scale\_bar: v0.2*. (Zenodo, 2021). doi:10.5281/ZENODO.5592446.
- 471 58. Peters, K. *korseby/create\_image\_stacks: v0.3*. (Zenodo, 2021).  
472 doi:10.5281/ZENODO.5592436.
- 473 59. Besson, S. *et al.* Bringing Open Data to Whole Slide Imaging. in *Digital Pathology* (eds.  
474 Reyes-Aldasoro, C. C., Janowczyk, A., Veta, M., Bankhead, P. & Sirinukunwattana, K.) vol.  
475 11435 3–10 (Springer International Publishing, 2019).
- 476 60. Marti, U. & Dupraz, H. *Swisstopo Scripts GPS WGS84 <-> LV03 (CH1903)*. (2021).
- 477 61. Peters. *korseby/bioimage\_submission: v0.1.0*. (Zenodo, 2022).  
478 doi:10.5281/ZENODO.6447017.
- 479 62. Adelson, E. H., Anderson, C. H., Bergen, J. R., Burt, P. J. & Ogden, J. M. Pyramid methods  
480 in image processing. 9 (1984).
- 481 63. Ogden, J. M., Adelson, E. H., Bergen, J. R. & Burt, P. J. Pyramid-based computer graphics.  
482 12 (1985).
- 483 64. Toet, A. Image fusion by a ratio of low-pass pyramid. *Pattern Recognition Letters* **9**, 245–  
484 253 (1989).
- 485 65. Liu, Z., Tsukada, K., Hanasaki, K., Ho, Y. K. & Dai, Y. P. Image fusion by using steerable  
486 pyramid. *Pattern Recognition Letters* **22**, 929–939 (2001).
- 487 66. Kozub, D. Focus stacking of captured images. 11.
- 488 67. Perkel, J. M. Computational pipelines turn raw data into reproducible scientific  
489 knowledge. 2.
- 490 68. Urmi, E., Hofmann, H. & Schubiger, C. *Scapania aspera* Bernet & M.Bernet. (2020)  
491 doi:10.5167/UZH-197490.
- 492 69. Urmi, E., Hofmann, H. & Schubiger, C. *Scapania subalpina* (Lindenb.) Dumort. (2020)  
493 doi:10.5167/UZH-197517.
- 494 70. Urmi, E., Hofmann, H. & Schubiger, C. *Scapania undulata* (L.) Dumort. (2020)  
495 doi:10.5167/UZH-197522.
- 496 71. Urmi, E., Peters, K. & Schubiger, C. *Scapania nemorea* subsp. *nemorea* (L.) Grolle. (2020)  
497 doi:10.5167/UZH-205668.
- 498 72. Urmi, E., Peters, K. & Schubiger, C. *Scapania aequiloba* (Schwäger.) Dumort. (2020)  
499 doi:10.5167/UZH-197488.
- 500 73. Urmi, E., Peters, K. & Schubiger, C. *Scapania apiculata* Spruce. (2020) doi:10.5167/UZH-  
501 197489.
- 502 74. Urmi, E., Peters, K. & Schubiger, C. *Scapania calcicola* (Arnell & J.Perss.) Ingham.  
503 (2020) doi:10.5167/UZH-197492.
- 504 75. Urmi, E., Peters, K. & Schubiger, C. *Scapania carinthiaca* Lindb. (2020) doi:10.5167/UZH-  
505 197494.
- 506 76. Urmi, E., Peters, K. & Schubiger, C. *Scapania compacta* (Roth) Dumort. (2020)  
507 doi:10.5167/UZH-197496.
- 508 77. Urmi, E., Peters, K. & Schubiger, C. *Scapania curta* (Mart.) Dumort. (2020)  
509 doi:10.5167/UZH-197497.
- 510 78. Urmi, E., Peters, K. & Schubiger, C. *Scapania cuspiduligera* (Nees) Müll.Frib. (2020)  
511 doi:10.5167/UZH-197499.

- 512 79. Urmí, E., Peters, K. & Schubiger, C. *Scapania degenii* Müll.Frib. (2020) doi:10.5167/UZH-  
513 197500.
- 514 80. Urmí, E., Peters, K. & Schubiger, C. *Scapania gracilis* Lindb. (2020) doi:10.5167/UZH-  
515 197503.
- 516 81. Urmí, E., Peters, K. & Schubiger, C. *Scapania gymnostomophila* Kaal. (2020)  
517 doi:10.5167/UZH-197504.
- 518 82. Urmí, E., Peters, K. & Schubiger, C. *Scapania helvetica* Gottsche. (2020)  
519 doi:10.5167/UZH-197505.
- 520 83. Urmí, E., Peters, K. & Schubiger, C. *Scapania irrigua* subsp. *irrigua* (Nees) Nees. (2020)  
521 doi:10.5167/UZH-197506.
- 522 84. Urmí, E., Peters, K. & Schubiger, C. *Scapania irrigua* subsp. *rufescens* (Loeske)  
523 R.M.Schust. (2020) doi:10.5167/UZH-197507.
- 524 85. Urmí, E., Peters, K. & Schubiger, C. *Scapania mucronata* subsp. *mucronata* H.Buch.  
525 (2020) doi:10.5167/UZH-197508.
- 526 86. Urmí, E., Peters, K. & Schubiger, C. *Scapania mucronata* subsp. *praetervisa* (Meyl.)  
527 R.M.Schust. (2020) doi:10.5167/UZH-197509.
- 528 87. Urmí, E., Peters, K. & Schubiger, C. *Scapania obscura* (Arnell & C.E.O.Jensen) Schiffn.  
529 (2020) doi:10.5167/UZH-197511.
- 530 88. Urmí, E., Peters, K. & Schubiger, C. *Scapania paludicola* Loeske & Müll.Frib. (2020)  
531 doi:10.5167/UZH-197513.
- 532 89. Urmí, E., Peters, K. & Schubiger, C. *Scapania paludosa* (Müll.Frib.) Müll.Frib. (2020)  
533 doi:10.5167/UZH-197514.
- 534 90. Urmí, E., Peters, K. & Schubiger, C. *Scapania scandica* (Arnell & H.Buch) Macvicar.  
535 (2020) doi:10.5167/UZH-197515.
- 536 91. Urmí, E., Peters, K. & Schubiger, C. *Scapania uliginosa* (Lindenb.) Dumort. (2020)  
537 doi:10.5167/UZH-197520.
- 538 92. Urmí, E., Peters, K. & Schubiger, C. *Scapania umbrosa* (Schrad.) Dumort. (2020)  
539 doi:10.5167/UZH-197521.
- 540 93. Urmí, E., Peters, K. & Schubiger, C. *Scapania verrucosa* Heeg. (2020) doi:10.5167/UZH-  
541 197523.
- 542
- 543
- 544
